# Supplementary material
Source: publisher figshare collection journal article supplement (https://brill.figshare.com/ndownloader/files/24613583)
Supplement: Supplementary file 1 [file 24613583]

Table 7. States Claiming a Contiguous Zone Beyond the Territorial Sea in 2019

| **State** | **CZ*** | **TS*** |
| --- | --- | --- |
| Algeriaa | 24 | 12 |
| Algeriaa | 24 | 12 |
| Angolaa | 24 | 12 |
| Antigua and Barbudaa | 24 | 12 |
| Argentinaa | 24 | 12 |
| Australiaa | 24 | 12 |
| Bahraina | 24 | 12 |
| Bangladesha | 18 | 12 |
| Belgiuma | 24 | 12 |
| Brazila | 24 | 12 |
| Bulgariaa | 24 | 12 |
| Burmaa (Myanmar) | 24 | 12 |
| Cambodia | 24 | 12 |
| Cameroona | 24 | 12 |
| Canadaa | 24 | 12 |
| Cape Verdea (Cabo Verde) | 24 | 12 |
| Chilea | 24 | 12 |
| Chinaa | 24 | 12 |
| China (Taiwan) | 24 | 12 |
| Colombia | 24 | 12 |
| Congo, Dom. Rep.a | 24 | 12 |
| Côte d’Ivoirea | 24 | 12 |
| Cubaa | 24 | 12 |
| Cyprusa | 24 | 12 |
| Denmarka | 24 | 12 |
| Djiboutia | 24 | 12 |
| Dominicaa | 24 | 12 |
| Dominican Republica | 24 | 12 |
| Egypta | 24 | 12 |
| El Salvadora | 24 | 12 |
| Estoniaa | 24 | 12 |
| Fijia | 24 | 12 |
| Finlanda | 14 | 12 |
| Francea & Overseas Departments/ Dependencies | 24 | 12 |
| Gabona | 24 | 12 |
| Gambia,a The | 18 | 12 |
| Georgiaa | 24 | 12 |
| Ghanaa | 24 | 12 |
| Guinea | 24 (coord.) | 12 (coord.) |
| Guyanaa | 24 | 12 |
| Haitia | 24 | 12 |
| Hondurasa | 24 | 12 |
| Indiaa | 24 | 12 |
| Iran | 24 | 12 |
| Irelanda | 24 | 12 |
| Italya | 24 | 12 |
| Jamaicaa | 24 | 12 |
| Japana | 24 | 12 |
| Kiribatia | 24 (coord.) | 12 (coord.) |
| Korea,a Republic of | 24 | 12 |
| Kuwaita | 24 | 12 |
| Liberiaa | 24 | 12 |
| Lithuaniaa | 24 (coord.) | 12 (coord.) |
| Madagascara | 24 | 12 |
| Maldivesa | 24 | 12 |
| Maltaa | 24 | 12 |
| Marshall Islandsa | 24 (coord.) | 12 (coord.) |
| Mauritaniaa | 24 | 12 |
| Mauritiusa | 24 | 12 |
| Mexicoa | 24 | 12 |
| Moroccoa | 24 | 12 |
| Mozambiquea | 24 | 12 |
| Namibiaa | 24 | 12 |
| Naurua | 24 | 12 |
| Netherlandsa | 24 | 12 |
| New Zealanda | 24 | 12 |
| Nicaraguaa | 24 | 12 |
| Niuea | 24 | 12 |
| Norwaya | 24 | 12 |
| Omana | 24 | 12 |
| Pakistana | 24 | 12 |
| Palaua | 24 | 12 |
| Panamaa | 24 | 12 |
| Portugala | 24 | 12 |
| Qatara | 24 | 12 |
| Romaniaa | 24 | 12 |
| Russian Federationa | 24 | 12 |
| Saint Kitts and Nevisa | 24 | 12 |
| Saint Luciaa | 24 | 12 |
| Saint Vincent & the Grenadinesa | 24 | 12 |
| Samoaa | 24 | 12 |
| Sao Tome & Principe | 24 | 12 |
| Saudi Arabiaa | 18 | 12 |
| Senegala | 24 | 12 |
| Seychellesa | 24 | 12 |
| Sierra Leonea | 24 | 12 |
| South Africaa | 24 | 12 |
| Spaina | 24 | 12 |
| Sri Lankaa | 24 | 12 |
| Sudana | 18 | 12 |
| Surinamea | 24 | 12 |
| Syria | 24 | 12 |
| Thailanda | 24 | 12 |
| Timor-Lestea | 24 | 12 |
| Trinidad and Tobagoa | 24 | 12 |
| Tunisiaa | 24 | 12 |
| Tuvalua | 24 | 12 |
| United Arab Emirates | 24 | 12 |
| United States | 24 | 12 |
| Uruguaya | 24 | 12 |
| Vanuatua | 24 | 12 |
| Venezuela | 24 | 12 |
| Vietnama | 24 | 12 |
| Yemena | 24 | 12 |
|  |  |  |
| Total of claimant States: 101 |  |  |

* Breadth in nautical miles as measured from the territorial sea baseline.

a Party to the 1982 LOS Convention.

Sources: US NTM 1(57)20; UK NTM 1(12)20; UN DOALOS; LOS Bull., No. 97, at 50 (Suriname). UK NTM lists Fiji as claiming a 200 M CZ and no other maritime zone. US NTM states Nicaragua’s CZ claim is uncertain. But see *infra* note 28 and accompanying text, MCRM and DOALOS table.

________________________________________________________________________
